# Supplementary material
Source: publisher figshare collection journal article supplement (https://geolsoc.figshare.com/ndownloader/files/28829058)
Supplement: Supplementary file 1 [file 28829058]

## Sheet: Ar-Ar data
Table S2. 40Ar-39Ar in-situ and step-heating data. Data are relative abundances, corrected for post-irradiation decay, mass discrimination effects and line blank.
Laser step-heating data, completed through a MAP215-50 single-collector noble gas mass spectrometer. Instrumental sensitivity ~2.0E-11 mol/pA.
no.	laser power W	36Aratm	% 1σ	37ArCa	% 1σ	38ArCl	% 1σ	39ArK	% 1σ	40Ar	% 1σ	40Ar*/39ArK	±2σ	Age	±2σ	40Ar*	39Ar(K)	Ca/K	±2σ
		[pA]		[pA]		[pA]		[pA]		[pA]				(Ma)		(%)	(%)
biotite D20-10-69, 0.50-0.25 mm, J = 0.00042827 ± 0.00000116 (PAV-80)
8B	0.15	0.806132	1.531	0.287801	305.076	0.231564	6.06323	2.07342	3.27044	276.432	0.264501	17.2462	3.80317	13.4704	2.95963	12.9345	0.13706	0.261922	1.59843
8C	0.3	0.708339	3.99951	2.74223	30.799	0.248816	8.6846	5.12971	1.95546	318.94	0.236755	20.9872	3.41349	16.3794	2.6521	33.7421	0.338995	1.00902	0.630911
8D	0.45	2.52274	1.50666	8.78783	10.8981	1.30038	2.50122	43.8027	0.433873	1573.51	0.0928451	18.736	0.548309	14.6294	0.426421	52.1488	2.89538	0.378589	0.0908475
8E	0.55	1.45214	3.30594	6.4447	13.107	2.16593	2.45325	109.181	0.309768	2380.24	0.0571618	17.8255	0.286053	13.9212	0.222551	81.7615	7.21765	0.111378	0.0312564
8G	0.65	0.98026	3.71151	4.12281	21.419	2.50652	2.5433	127.892	0.214774	2570.99	0.0747024	17.8076	0.18877	13.9072	0.146866	88.5806	8.45478	0.0608252	0.0267581
8H	0.75	0.587322	4.04183	2.99263	29.7305	2.12945	1.73442	121.204	0.30837	2316.51	0.0569123	17.6583	0.16132	13.7911	0.125517	92.3895	8.01264	0.0465875	0.0280918
8I	0.88	0.435833	4.37608	2.85777	34.0329	2.22094	2.00635	124.033	0.229656	2323.16	0.0857981	17.6735	0.126736	13.8029	0.0986083	94.3565	8.19968	0.0434733	0.0299088
8K	1.03	0.347511	6.17273	3.34753	26.8107	2.16068	2.24949	114.105	0.214491	2139.59	0.0995409	17.8347	0.140912	13.9284	0.10963	95.111	7.54332	0.0553546	0.0301946
8L	1.18	0.383789	3.98954	1.73365	51.8214	2.09363	1.725	114.566	0.278039	2141.72	0.0776124	17.6857	0.129965	13.8124	0.101119	94.6042	7.5739	0.0285517	0.0297297
8M	1.35	0.393277	6.59193	2.10106	43.2972	2.29307	1.44473	124.229	0.26335	2316.6	0.0798436	17.6945	0.158455	13.8193	0.123286	94.8864	8.21267	0.0319114	0.0278177
8N	1.55	0.547042	5.10513	2.00376	46.222	3.28654	2.55146	178.513	0.19966	3328.97	0.0809105	17.7247	0.121051	13.8428	0.0941824	95.0465	11.8014	0.0211789	0.019693
8Q	1.75	0.346762	4.48091	1.28283	69.9422	2.10335	2.98965	117.927	0.239599	2198.85	0.0672567	17.7592	0.11861	13.8696	0.0922823	95.2441	7.79613	0.020525	0.0287847
8R	2.05	0.466375	5.02145	1.58504	55.3302	2.67671	2.43263	148.505	0.22353	2784.74	0.117439	17.8055	0.130959	13.9056	0.101888	94.9525	9.81758	0.0201386	0.0223764
8S	2.5	0.574672	4.37194	2.92522	32.4794	3.11549	2.83404	164.222	0.234073	3165.37	0.0868305	18.2221	0.129426	14.2297	0.100677	94.5364	10.8566	0.0336091	0.0220898
8U	3.5	0.0174196	117.093	0.849635	43.3431	0.136249	14.9668	8.99761	0.750995	227.849	0.205178	24.7445	1.40769	19.2963	1.09193	97.7076	0.594792	0.17818	0.155505
8V	12	0.0270902	39.3421	1.33849	21.6354	0.136549	14.9113	8.28154	1.10574	246.698	0.169373	28.8182	1.00357	22.4537	0.777101	96.7303	0.54743	0.304985	0.135616
total gas age												17.9391	0.04997	14.0096	0.0848			0.0566251	0.0102284
age plateau (8E-8R)												17.7391	0.04527	13.8539	0.0824
Line blanks were below:		0.064		1.1		0.0809		2.464		41.1708
biotite D18-10-64, 0.35-0.25 mm, J = 0.000203405 ± 0.000000773 (PAV-78)
85B	0.15	1.09278	3.56722	0.021173	3724.22	0.226096	8.19467	1.23055	7.45858	346.828	0.204898	16.7046	19.1221	6.20929	7.09619	5.92677	0.191946	0.0324647	2.41812
85C	0.3	3.07974	1.07669	0.115764	655.874	0.679184	6.40996	6.45566	2.23984	983.251	0.137535	9.86909	3.14002	3.67099	1.1669	6.47959	1.00697	0.0338348	0.443843
85D	0.45	1.50871	1.65228	2.07069	36.728	0.844948	5.21046	27.8297	0.60967	1230.25	0.0897615	28.0185	0.640477	10.4028	0.237129	63.3774	4.34078	0.140396	0.104095
85F	0.6	0.99463	3.26002	2.21614	34.2569	1.2447	7.25911	65.4228	0.475865	2355.19	0.103099	31.4542	0.427561	11.6744	0.158188	87.3718	10.2047	0.0639151	0.0442589
85G	0.75	0.868917	2.15487	1.05209	72.7717	1.42152	4.2816	80.0202	0.469493	2687.31	0.090464	30.3326	0.323085	11.2594	0.119562	90.3205	12.4819	0.0248075	0.0361915
85H	0.88	0.674059	3.15899	0.757777	100.039	1.38042	3.90003	72.6681	0.538032	2383.41	0.10488	30.0205	0.373819	11.1439	0.138345	91.5293	11.3351	0.0196754	0.0394161
85J	1.03	0.851765	2.45117	1.06996	72.1846	1.59393	3.00239	91.8069	0.593141	3030.67	0.0749991	30.2329	0.386726	11.2225	0.143116	91.5824	14.3204	0.0219898	0.0318236
85K	1.2	0.578486	5.50321	0.72749	109.215	1.59601	5.35964	85.6694	0.55319	2705.27	0.0994297	29.5531	0.40014	10.9709	0.148101	93.5871	13.3631	0.0160224	0.0350349
85L	1.4	0.372828	4.48851	0.271818	295.356	1.37323	3.37372	80.3382	0.510897	2486.14	0.0945014	29.551	0.331781	10.9701	0.122799	95.4922	12.5315	0.00638382	0.0377155
85O	1.7	0.159957	9.49114	0.064443	1214.26	0.679325	4.71967	47.1946	0.273266	1576.79	0.0986565	32.3889	0.269426	12.0202	0.0996626	96.9426	7.36165	0.00257637	0.0625682
85P	2.2	0.118785	13.0957	0.743535	106.461	0.657632	4.98037	42.9324	0.760713	1451.34	0.0899178	32.9711	0.549692	12.2355	0.20331	97.5317	6.69674	0.0326773	0.0696557
85Q	3	0.129546	11.0583	1.25315	63.1497	0.450003	4.88594	32.4682	0.615228	1123.25	0.0536781	33.3983	0.489601	12.3935	0.181069	96.5373	5.06442	0.0728252	0.09227
85R	10	0.0275184	45.7689	0.906754	86.984	0.102694	17.8668	7.05787	1.14742	304.509	0.156412	41.9847	1.44316	15.5663	0.532785	97.3026	1.10082	0.242427	0.422477
total gas age												30.474	0.138	11.3117	0.099679			0.0331675	0.0168423
isochron age (85F-85L, initial 40Ar/36Ar=471±55)												28.572	0.51603	10.6077	0.20726
Line blanks were below:		0.08945		1.6478		0.19761		3.6548		37.331
Laser in-situ data, data completed through an ARGUS VI multi-collector noble gas mass spectrometer. Instrumental sensitivity ~5.0E-17 mol/fA.																						Line blanks
no.	description	μm2	36Aratm	% 1σ	37ArCa	% 1σ	38ArCl	% 1σ	39ArK	% 1σ	40Ar	% 1σ	40Ar*/39ArK	±2σ	Age	±2σ	40Ar*	39Ar(K)	Ca/K	±2σ		36Ar	±1σ	37Ar	±1σ	38Ar	±1σ	39Ar	±1σ	40Ar	±1σ
			[fA]		[fA]		[fA]		[fA]		[fA]				(Ma)		(%)	(%)				[fA]		[fA]		[fA]		[fA]		[fA]
rock chip D20-10-49, J = 0.00575081 ± 0.00000288 (PAV-84)
98B	Bt	200x60	0.0298332	3.8135	0.316092	8.67916	0.116582	24.001	9.13394	0.173532	20.2875	0.281218	1.23904	0.0755683	12.9976	0.789872	55.7832	2.29257	0.0652964	0.0130826		0.0531955	0.0004841	0.0829551	0.007658	0.0474425	0.017193	0.10119	0.0081891	13.0718	0.025929
98C	WM S1	200x60	0.00303469	18.187	0.442198	8.41625	0.0979763	28.3709	7.93582	0.151631	10.7369	0.344874	1.23359	0.0427379	12.9406	0.446729	91.1731	1.99182	0.105139	0.0205876		0.0531955	0.000484104	0.0829551	0.00765804	0.0474425	0.017193	0.10119	0.00818906	13.0718	0.0259292
98E	WM S1	150x80	0.00307673	23.5246	0.139044	32.1492	0.138835	29.9049	11.2942	0.114096	14.6632	0.225348	1.20824	0.0388161	12.6756	0.405795	93.0621	2.83482	0.0232287	0.0151153		0.052954	0.000514047	0.11353	0.00783362	0.0295727	0.0312424	0.0990369	0.00895455	13.5533	0.0187879
98F	Bt	200x70	0.00973832	6.49594	0.298002	12.2419	0.168627	24.0064	10.6424	0.151437	15.4577	0.237723	1.17188	0.0363429	12.2955	0.380019	80.6808	2.67121	0.0528337	0.013974		0.052954	0.000514047	0.11353	0.00783362	0.0295727	0.0312424	0.0990369	0.00895455	13.5533	0.0187879
98H	WM S2	~300x30	0.00461022	12.1258	0.123002	28.5888	0.0670173	63.3715	6.37863	0.211145	9.40553	0.360343	1.25059	0.0536707	13.1183	0.560952	84.8109	1.60102	0.0363843	0.02112		0.0534072	0.000420039	0.101333	0.00850458	0.0220031	0.0387151	0.108816	0.008953	13.396	0.0191318
98I	WM S1	200x60	0.00401441	15.1695	0.161357	21.4575	0.11563	39.9729	8.92554	0.141502	11.9528	0.218867	1.19663	0.0413062	12.5543	0.431856	89.355	2.24029	0.0341102	0.0150309		0.0534072	0.000420039	0.101333	0.00850458	0.0220031	0.0387151	0.108816	0.008953	13.396	0.0191318
98K	Bt		0.00594038	10.5534	0.305152	11.097	0.183136	12.6422	13.4551	0.0976108	18.237	0.150467	1.21571	0.0282247	12.7537	0.295056	89.693	3.37718	0.0427917	0.010417		0.0578159	0.000446955	0.0830393	0.00798352	0.0145035	0.0145762	0.0932646	0.00752837	14.5667	0.0152955
98L	WM S2		0.547233	0.22391	77.7965	0.152464	0.462594	5.44422	27.5447	0.0632018	190.654	0.0162333	1.20964	0.0302316	12.6902	0.316047	17.4418	6.90014	5.33951	0.534242		0.0578159	0.000446955	0.0830393	0.00798352	0.0145035	0.0145762	0.0932646	0.00752837	14.5667	0.0152955
98N	WM S1	200x100	0.00574245	10.2787	0.0432966	78.8387	0.123631	28.3232	10.1324	0.145402	13.8307	0.214963	1.18641	0.0354508	12.4474	0.37066	86.9162	2.54323	0.00806245	0.0127382		0.0586669	0.000498374	0.0978031	0.00769049	0.0383644	0.0196962	0.0907119	0.00746888	14.7156	0.01994
98O	Bt	200x60	0.00711979	9.50048	0.206677	18.4147	0.134392	18.7642	12.6225	0.102856	17.5833	0.225343	1.2162	0.0327109	12.7589	0.341953	87.3067	3.16822	0.0308941	0.0117902		0.0586669	0.000498374	0.0978031	0.00769049	0.0383644	0.0196962	0.0907119	0.00746888	14.7156	0.01994
237E	WM S1	200x60	0.00248099	26.5203	0.197853	344.184	0.124176	42.0352	10.1304	0.136936	13.5059	0.217725	1.25195	0.0408202	13.1325	0.426638	93.9034	2.5427	0.0368508	0.253696		0.0383598	0.000483182	0.0728399	0.00894955	0.014992	0.045872	0.0527199	0.0101205	9.11437	0.0209476
237F	WM S1	200x60	0.00662994	8.68668	0.487528	85.5837	0.131603	37.968	10.0895	0.161984	14.4025	0.248347	1.2255	0.0356777	12.856	0.372947	85.8482	2.5324	0.0911731	0.156325		0.0383598	0.000483182	0.0728399	0.00894955	0.014992	0.045872	0.0527199	0.0101205	9.11437	0.0209476
237H	WM S2	~200x60	0.00374459	18.2889	0.389966	121.286	0.18812	27.2965	15.2937	0.099184	19.3527	0.161033	1.18464	0.0276021	12.4289	0.2886	93.616	3.83866	0.0481112	0.116803		0.0367208	0.000425117	0.0699383	0.0123397	0.0216762	0.045973	0.0611723	0.00840335	9.56597	0.024443
237I	WM S2	~200x60	0.0060442	9.91761	0.159842	323.837	0.199843	25.7541	14.2674	0.120347	18.6308	0.177186	1.17064	0.026329	12.2825	0.275311	89.6461	3.58109	0.0211386	0.136925		0.0367208	0.000425117	0.0699383	0.0123397	0.0216762	0.045973	0.0611723	0.00840335	9.56597	0.024443
237K	Bt	100x100	0.0150944	4.29488	0.647017	67.5028	0.175496	16.7803	14.8817	0.110843	22.1547	0.128358	1.17969	0.0268472	12.3771	0.280714	79.2395	3.73521	0.082035	0.111055		0.038578	0.000426377	0.0642284	0.00732958	0.03136	0.0229696	0.0620221	0.0108409	9.52651	0.0210065
237L	WM S1	100x100	0.00275002	24.8931	1.09756	39.3151	0.119169	25.1207	10.2821	0.143878	13.1998	0.199216	1.20284	0.040798	12.6192	0.426528	93.6898	2.58063	0.201419	0.159653		0.038578	0.000426377	0.0642284	0.00732958	0.03136	0.0229696	0.0620221	0.0108409	9.52651	0.0210065
237N	WM S1	100x100	0.00280434	22.4524	1.07157	36.501	0.139315	25.7923	8.75825	0.205387	11.9545	0.277842	1.26981	0.0444973	13.3192	0.465023	93.023	2.19814	0.230867	0.170114		0.0398017	0.000411093	0.0654146	0.00967612	0.011373	0.0208486	0.0694125	0.0154759	9.70227	0.0197173
237O	WM S2	~200x100	0.012652	6.87345	0.313043	124.124	0.165615	17.2461	12.7057	0.146739	19.5282	0.16854	1.23196	0.0416527	12.9235	0.43539	80.1536	3.18908	0.0464876	0.115499		0.0398017	0.000411093	0.0654146	0.00967612	0.011373	0.0208486	0.0694125	0.0154759	9.70227	0.0197173
237U	WM S1	100x100	0.0315782	2.56065	0.337954	154.37	0.0973662	42.0025	12.0795	0.140651	24.6126	0.112258	1.24959	0.0410083	13.1078	0.428611	61.3271	3.03191	0.0527885	0.163065		0.0380631	0.000571012	0.0760047	0.0133806	0.0342382	0.0322538	0.0791563	0.0108712	9.18144	0.0161357
237V	WM S2	200x60	0.0209778	3.68346	0.34303	154.582	0.112072	34.0552	11.6738	0.106811	20.3845	0.121394	1.20232	0.0405125	12.6137	0.423544	68.853	2.93006	0.0554441	0.171503		0.0380631	0.000571012	0.0760047	0.0133806	0.0342382	0.0322538	0.0791563	0.0108712	9.18144	0.0161357
237X	WM S2	~200x60	0.0250552	2.73262	3.41498	13.9706	0.165566	15.2919	9.89238	0.119967	19.3228	0.134905	1.21571	0.0425264	12.7537	0.444564	62.2238	2.4824	0.651502	0.19335		0.0423015	0.000463152	0.0660275	0.00963416	0.0059143	0.021654	0.0426353	0.0070504	10.7379	0.0173399
237Y	WM S1	100x100	0.0411289	1.59449	0.114524	378.597	0.132471	27.4188	13.2484	0.100745	28.4276	0.0923871	1.20984	0.0304375	12.6924	0.3182	56.3833	3.32534	0.0163102	0.12351		0.0423015	0.000463152	0.0660275	0.00963416	0.0059143	0.021654	0.0426353	0.0070504	10.7379	0.0173399
238A	Bt	100x100	0.0182337	3.59441	0.0516793	1444.45	0.0881768	43.5407	7.29759	0.16899	14.2848	0.241995	1.20233	0.0570477	12.6138	0.596414	61.4225	1.83169	0.0133617	0.38601		0.0383969	0.000321184	0.0697616	0.00770968	0.0480415	0.0255276	0.0280595	0.00788525	9.44749	0.0213669
238B	WM S1	100x100	0.0212369	2.77739	0.345599	115.703	0.120698	27.8782	11.433	0.0966076	20.2885	0.160838	1.21269	0.0319365	12.7222	0.333865	68.3368	2.86964	0.0570353	0.132107		0.0383969	0.000321184	0.0697616	0.00770968	0.0480415	0.0255276	0.0280595	0.00788525	9.44749	0.0213669
238D	WM S2	100x100	0.0164613	3.87872	-0.276941	248.55	0.155253	28.1614	11.9116	0.135621	19.0429	0.156739	1.17448	0.0338672	12.3227	0.354126	73.4666	2.98985	-0.0438669	0.218106		0.0350013	0.000291303	0.0790686	0.0162746	0.0105663	0.0418083	0.0490628	0.0102603	8.64773	0.0201694
238E	WM S1	100x100	0.0275433	2.21815	0.000467654	132151	0.185149	25.4743	15.2773	0.0948291	26.549	0.109009	1.18981	0.0251616	12.4829	0.263075	68.4661	3.83461	5.77568e-05	0.152653		0.0350013	0.000291303	0.0790686	0.0162746	0.0105663	0.0418083	0.0490628	0.0102603	8.64773	0.0201694
238G	WM S1	100x100	0.0586327	1.4562	0.680849	88.8515	0.245463	13.618	16.6143	0.0981439	38.9909	0.0965532	1.28691	0.0317397	13.4979	0.331666	54.8348	4.17009	0.0773222	0.137621		0.0376911	0.00031588	0.072337	0.0166664	0.0198231	0.0263544	0.0399662	0.0113412	8.88769	0.0275544
238H	WM S2	200x60	0.0230665	2.7359	1.96412	39.8068	0.150339	20.9059	8.07069	0.195375	16.5828	0.203187	1.21188	0.0501894	12.7136	0.524683	58.9708	2.0254	0.459256	0.368508		0.0376911	0.00031588	0.072337	0.0166664	0.0198231	0.0263544	0.0399662	0.0113412	8.88769	0.0275544
238J	WM S1	100x100	0.0340492	2.04693	1.06795	58.431	0.1575	20.6621	9.21146	0.153997	21.1501	0.182084	1.19246	0.0474205	12.5107	0.495793	51.9309	2.3119	0.218767	0.256591		0.0366007	0.000428384	0.0698631	0.00952793	-0.00385236	0.0245302	0.0517429	0.00988634	9.34545	0.0246827
238K	WM S1	200x100	0.0562487	1.39085	0.926378	56.816	0.31434	10.0434	24.1704	0.064295	45.4845	0.0747166	1.18041	0.0199497	12.3846	0.208594	62.7249	6.06662	0.072317	0.0824928		0.0366007	0.000428384	0.0698631	0.00952793	-0.00385236	0.0245302	0.0517429	0.00988634	9.34545	0.0246827
238P	WM S2	~200x60	0.0374256	2.11191	1.21967	60.9222	0.135876	22.6823	7.45077	0.176623	20.2097	0.175168	1.21669	0.0662454	12.764	0.692515	44.8512	1.86993	0.308897	0.377641		0.035901	0.000389216	0.0747512	0.0159507	0.018982	0.0246553	0.0776626	0.00820357	8.55713	0.0210716
238Q	WM S2	~200x60	0.0175352	4.01537	0.111684	523.883	0.120898	26.7832	7.22535	0.260056	15.0024	0.202388	1.34361	0.0606418	14.0903	0.633471	64.7094	1.81355	0.029165	0.305595		0.035901	0.000389216	0.0747512	0.0159507	0.018982	0.0246553	0.0776626	0.00820357	8.55713	0.0210716
238S	WM S1	100x100	0.048102	1.54445	0.297077	282.235	0.209763	16.6978	18.4409	0.0741187	36.5437	0.087221	1.19447	0.0254871	12.5317	0.26647	60.2752	4.62862	0.030396	0.171603		0.0374041	0.000580597	0.0690428	0.0124592	0.0315424	0.0246432	0.0668972	0.00802009	9.27958	0.0216794
weighted mean white mica (23/27), MSWD = 1.52															12.58	0.09
weighted mean biotite (6/6), MSWD = 1.59															12.57	0.19
Constants ±1σ
Decay Constant 40K = 5.463 ± 0.107 E-10 1/a									PAV-78 (MAP215-50)						PAV-84 (ARGUS VI)
Decay Constant 39Ar = 2.940 ± 0.029 E-07 1/h									Production Ratio 39/37(Ca) = 0.000726 ± 0.000036						Production Ratio 39/37(Ca) = 0.000696 ± 0.000015
Decay Constant 37Ar = 8.230 ± 0.082 E-04 1/h									Production Ratio 38/37(Ca) = 0.000105 ± 0.000016						Production Ratio 38/37(Ca) = 0.000058 ± 0.000005
Atmospheric Ratio 40/36(a) = 298.56 ± 0.30									Production Ratio 36/37(Ca) = 0.000260± 0.000026						Production Ratio 36/37(Ca) = 0.0002690 ± 0.0000048
Atmospheric Ratio 38/36(a) = 0.1885 ± 0.0003									Production Ratio 40/39(K) = 0.00969 ± 0.00078						Production Ratio 40/39(K) = 0.00973 ± 0.000011
Ages relative to an age of 28.201 Ma for the Fish Canyon Sanidine (FCs)									Production Ratio 38/39(K) = 0.01283 ± 0.00013						Production Ratio 38/39(K) = 0.01265 ± 0.00027
									Mass discrimination (atomic mass unit): 1.0027±0.0018						Mass discrimination 98B÷98O (atomic mass unit): 1.00145±0.00010
															Mass discrimination 237E÷238S (atomic mass unit): 1.00164±0.00010
									PAV-80 (MAP215-50)
									Production Ratio 39/37(Ca) = 0.000718 ± 0.000037
									Production Ratio 38/37(Ca) = 0.000105 ± 0.000016
									Production Ratio 36/37(Ca) = 0.000255 ± 0.000024
									Production Ratio 40/39(K) = 0.00969 ± 0.00078
									Production Ratio 38/39(K) = 0.01283 ± 0.00013
									Mass discrimination (atomic mass unit): 1.0025±0.0010
